# Supplementary material
Source: publisher figshare collection journal article supplement (https://acs.figshare.com/ndownloader/files/24581518)
Supplement: Supplementary file 1 [file 24581518]

# **Proteomic profiling of a fast neutron induced soybean mutant unveiled pathways associated with increased seed protein content**

Nazrul Islam<sup>1</sup>, Hari B. Krishnan<sup>2</sup> and Savithiry Natarajan<sup>1</sup>

<sup>1</sup>Soybean Genomics and Improvement Laboratory, USDA-ARS, MD.20705, USA

<sup>2</sup>Plant Genetics Research Unit, USDA-ARS, University of Missouri, Columbia, MO. 65211, USA.

## Supporting Information (S)

Table S1. Total protein identified with at least 1 significant spectrum and their relative abundance. WT\_1, wild rep1; WT\_2, wild rep2; WT\_3, wild rep3; 3\_1, mutant rep1; 3\_2, mutant rep2; 3\_3, mutant rep3.

Table S2. Total protein identified with more than 1 significant spectrum and their normalized abundance. WT\_1, wild rep1; WT\_2, wild rep2; WT\_3, wild rep3; 3\_1, mutant rep1; 3\_2, mutant rep2; 3\_3, mutant rep3.

Table S3: Number of proteins that were up-regulated along with their peptide spectrum matches and p-values. WT\_1, wild rep1; WT\_2, wild rep2; WT\_3, wild rep3; 3\_1, mutant rep1; 3\_2, mutant rep2; 3\_3, mutant rep3.

Table S4: Number of proteins that showed significantly lower abundant along with their peptide spectrum matches and p-values. WT\_1, wild rep1; WT\_2, wild rep2; WT\_3, wild rep3; 3\_1, mutant rep1; 3\_2, mutant rep2; 3\_3, mutant rep3.

Table S5: Number of proteins that showed no significant difference along with their peptide spectrum matches and p-values. WT\_1, wild rep1; WT\_2, wild rep2; WT\_3, wild rep3; 3\_1, mutant rep1; 3\_2, mutant rep2; 3\_3, mutant rep3.

Figure S1. Gene Ontology terms of the lower abundant proteins analyzed by AgriGO (<http://bioinfo.cau.edu.cn/agriGO/search.php>)

Figure S2: Protein associated with 29 ribosomal units increased significantly, of which 16 belongs to large ribosomal subunits and 13 to the small subunits. Red indicates higher abundance.

Figure S3: Mapping of ER proteins, Red indicates higher abundance and yellow indicates lower abundance.

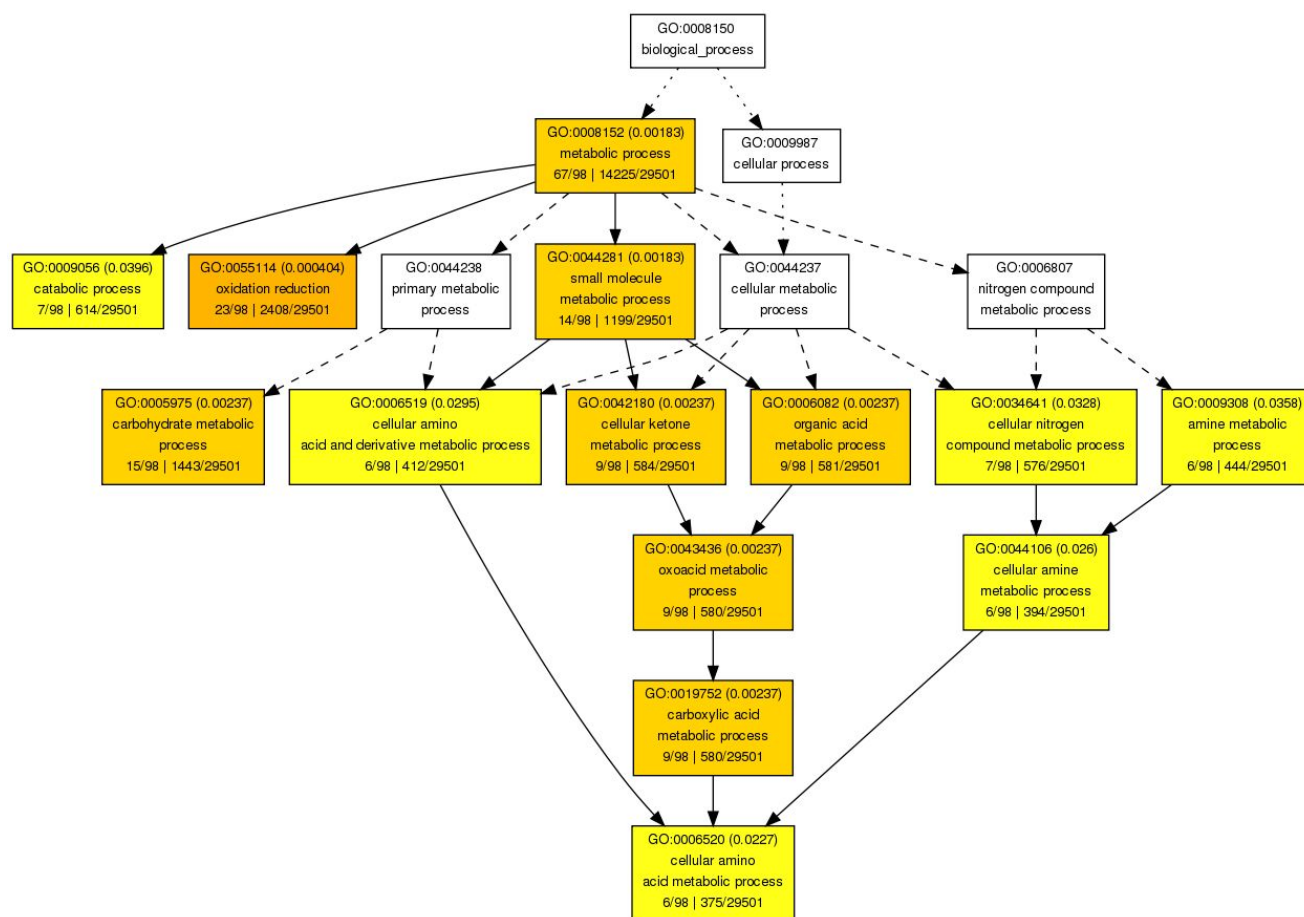

Figure S1. Gene Ontology terms of the lower abundant proteins analyzed by AgriGO (<http://bioinfo.cau.edu.cn/agriGO/search.php>)

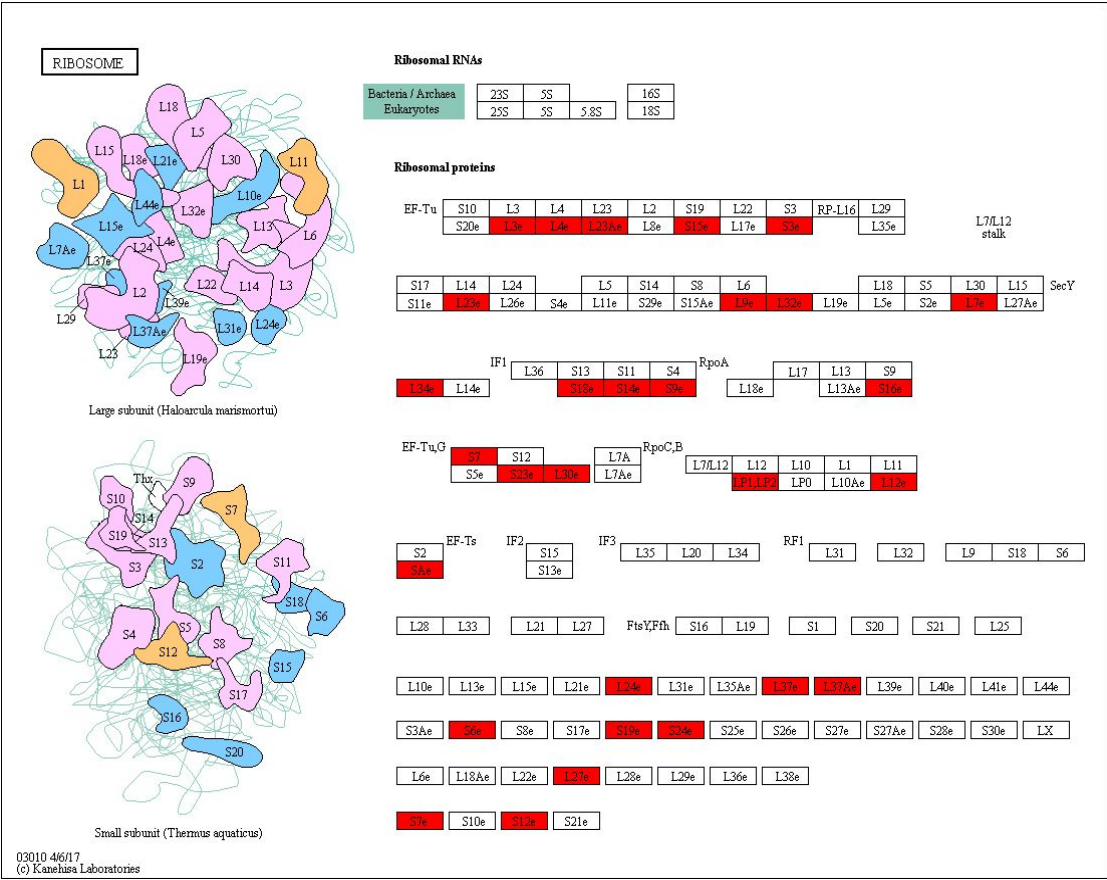

Figure S2: Protein associated with 29 ribosomal units increased significantly, of which 16 belongs to large ribosomal subunits and 13 to the small subunits. Red indicates higher abundance.

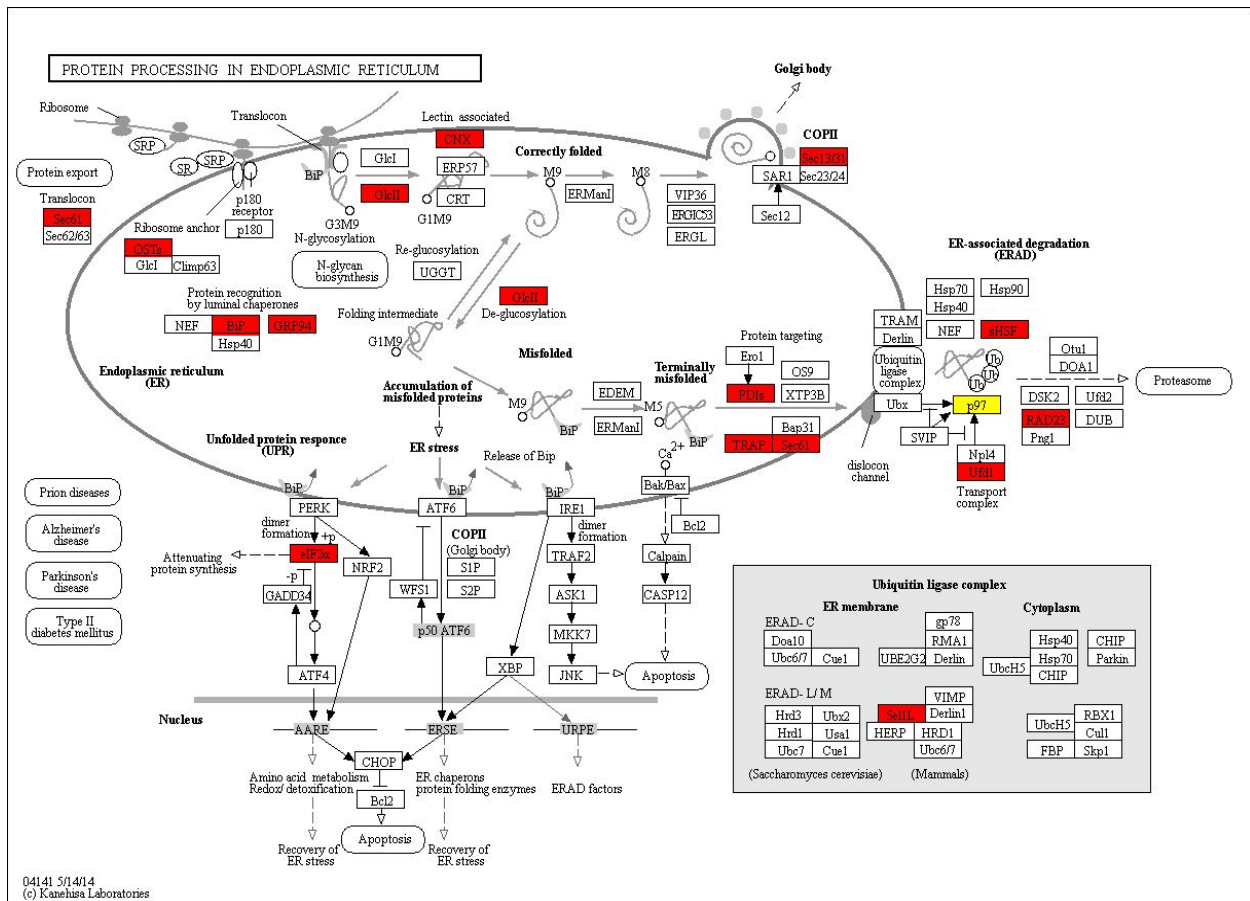

Figure S3: Mapping of ER proteins, Red indicates higher abundance and yellow indicates lower abundance.
